# Supplementary material
Source: ML conference proceedings conference paper supplement (https://openreview.net/forum?id=aiSZqS5wkB)
Supplement: supplementary_material [file attachment]

## THE COLOSSEUM APPENDIX

### I. PERTURBATION FACTORS SELECTION RATIONALE

We study recent real-world diverse robot datasets, such as, Open-X [? ], DROID [? ], Ego4D [? ], and conclude that our identified factors indeed exist in these datasets. In Figure 1, randomly sampled from DROID dataset, we can observe that `MO_Color/Texture/Size`, `Light_Color`, `Table_Color/Texture`, `Distractors`, `Camera_Pose`, `Background` changing across scenes. While it is not explicitly reported, we can also infer that mass of cups would also change. While these factors do not cover the exhaustive list of factors that vary in the real-world, our empirical analysis shows that THE COLOSSEUM factors do affect the SoTA robot manipulation models, and hence are important to study. It is challenging to breakdown real-world into an exhaustive systematic enumeration of factors. THE COLOSSEUM is one of the first attempt towards increasing real-world task robustness for robotic manipulation via such a systematic perturbation benchmark.

### II. SIMULATION TASK DETAILS

We describe each of the 20 tasks in detail, along with their RL Bench variations and success condition.

#### A. *open drawer*

**Filename:** `open_drawer.py`

**Task:** Open one of the three drawers: `bottom`, `middle`, or `top`. **Success Metric:** The prismatic joint of the specified drawer is fully extended.

#### B. *slide block to target*

**Filename:** `slide_block_to_target.py`

**Task:** Slide the block to square target. **Success Metric:** Some part of the block is inside the specified target area.

#### C. *basketball in hoop*

**Filename:** `basketball_in_hoop.py`

**Task:** Pick up the basketball and put it into the hoop. **Success Metric:** 1 basketball falls into the hoop.

#### D. *meat on grill*

**Filename:** `meat_on_grill.py`

**Task:** Take either the `chicken` or `steak` off the rack and put it on the grill. **Success Metric:** The specified meat is on the grill.

#### E. *close box*

**Filename:** `close_box.py`

**Task:** Close the box. **Success Metric:** The revolute joint of the specified handle is at least  $60^\circ$  off from the starting position.

#### F. *close laptop lid*

**Filename:** `Close_Laptop_Lid.py`

**Task:** Close the laptop lid. **Success Metric:** The revolute joint of the specified handle is at least  $60^\circ$  off from the starting position.

#### G. *empty dishwasher*

**Filename:** `empty_dishwasher.py`

**Task:** Open the dishwasher and take out the plate. **Success Metric:** The plate has been taken out of the dishwasher.

#### H. *reach and drag*

**Filename:** `reach_and_drag.py`

**Task:** Grab the stick and use it to drag the cube on to the target square. **Success Metric:** Some part of the block is inside the specified target area.

#### I. *get ice from fridge*

**Filename:** `get_ice_from_fridge.py`

**Task:** Pick up the cup and push it against the ice dispenser. **Success Metric:** Cup pushed against the ice dispenser.

#### J. *hockey*

**Filename:** `hockey.py`

**Task:** Pick up the hockey stick, and hit the ball into the goal pose. **Success Metric:** The ball enters into the goal pose.

#### K. *put money in safe*

**Filename:** `put_money_in_safe.py`

**Task:** Pick up the stack of money and put it inside the safe on the specified shelf. The shelf has three placement locations: `top`, `middle`, `bottom`. **Success Metric:** The stack of money is on the specified shelf inside the safe.

#### L. *place wine at rack location*

**Filename:** `place_wine_at_rack_location.py`

**Task:** Grab the wine bottle and put it on the wooden rack at one of the three specified locations: `left`, `middle`, `right`. The locations are defined with respect to the orientation of the wooden rack. **Success Metric:** The wine bottle is at the specified placement location on the wooden rack.

#### M. *move hanger*

**Filename:** `move_hanger.py`

**Task:** Pick up the hanger and move it from one side to another. **Success Metric:** The hanger is successfully hooked onto the other hanger holder.

#### N. *wipe desk*

**Filename:** `wipe_desk.py`

**Task:** Pick up the sponge and wipe the dust particles off the desk. **Success Metric:** The table is being cleaned up.

#### O. *straighten rope*

**Filename:** `straighten_rope.py`

**Task:** Pick up one end of the rope and move it to the nearest tape patch, and the same for the other end. **Success Metric:** The two patches have one side of the rope on each.

#### P. *insert onto square peg*

**Filename:** `insert_onto_square_peg.py`

**Task:** Pick up the square and put it on the specified color spoke. The spoke colors are sampled from the full set of 20 color instances. **Success Metric:** The square is on the specified spoke.

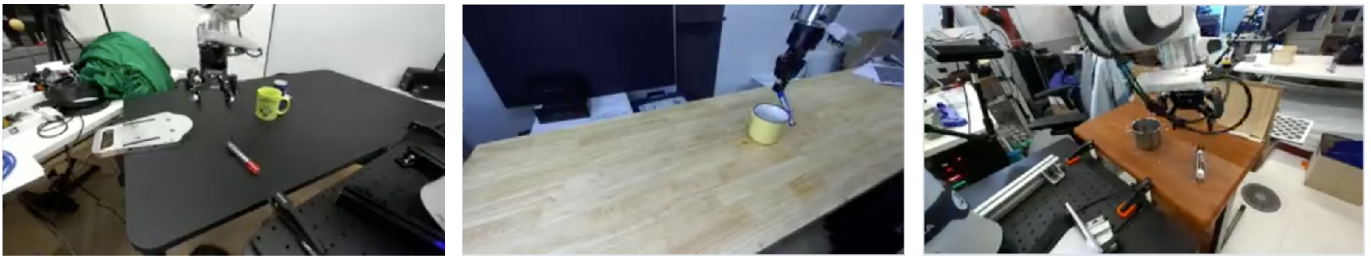

MO: Marker

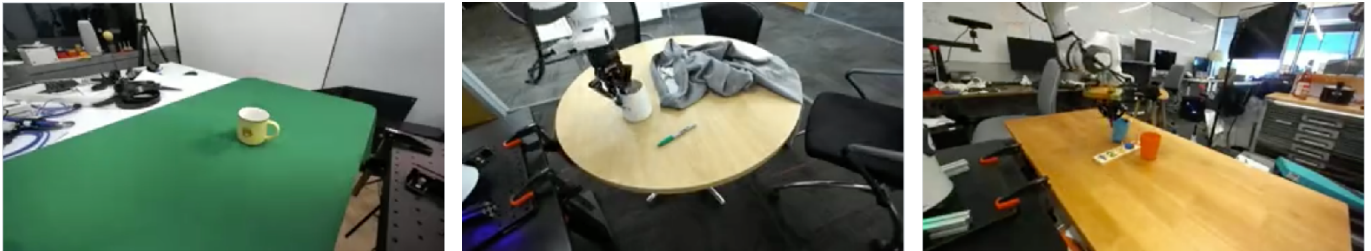

MO: Cup

Fig. 1: Dataset samples from DROID showing scene variations including MO\_Color/Texture/Size, Light\_Color, Table\_Color/Texture, Distractors, Camera\_Pose, Background, supporting our choice perturbation\_factors.

*Q. stack cups*

**Filename:** stack\_cups.py

**Task:** Stack all cups on top of the specified color cup. The cup colors are sampled from the full set of 20 color instances. The scene always contains three cups. **Success Metric:** All other cups are inside the specified cup.

*R. turn oven on*

**Filename:** turn\_oven\_on.py

**Task:** Grasp onto the knob and turn it on. **Success Metric:** The knob is turned on.

*S. setup chess*

**Filename:** setup\_chess.py

**Task:** Pick up the odd chess pieces and put it into the start position. **Success Metric:** The odd one out chess piece has been placed on the designated spot.

*T. scoop with spatula*

**Filename:** Scoop\_with\_Spatula.py

**Task:** Pick up the spatula and scoop up the cube. **Success Metric:** The cube has been successfully picked up using the spatula.

III. SIMULATION DETAILS

We provide full benchmark perturbation details for each task in Tables II. Tables II defines MO and RO objects for each task, specifies whether the applied perturbation is sampled from a discrete set or a continuous range, and finally provides the corresponding set size or the range. ‘-’ means the perturbation

does not apply due to either absence of RO for the task, or the simulator doesn’t support that factor for the specified object. The remaining 6 perturbation\_factors apply to all the tasks. We specify their corresponding perturbation parameters in the main text (Section III.C). In Figure 2, we show an example of a task configuration file, and how its perturbation\_factors and their parameters can be specified or changed. In Figures 3- 22, we show all perturbed views for each task.

A. Training details and Detailed results

To train the baseline models, we use 1-4 NVIDIA RTX A6000 for 1-6 days. For a full evaluation over THE COLOSSEUM, we run multiple parallel jobs with batches launching in a sequence. Total compute used for this process was 4 NVIDIA RTX A6000 over 2-3 days for each model.

We report detailed per task success rates on each of the perturbation\_factors in Tables III-VI for all the baselines.

IV. REAL WORLD DETAILS

A. Robot hardware setup

The real-robot experiments use a Franka Panda manipulator with a parallel gripper. For perception, we use a Kinect-2 RGB-D camera mounted on a tripod, at an angle, pointing towards the tabletop. Kinect-2 provides RGB-D images of resolution 512 × 424 at 30Hz. The extrinsic between the camera and robot base-frame are calibrated with the easy hand-eye package. We use an ARUCO AR marker mounted on the gripper to aid the calibration process, as shown in Figure 23.

### B. Task setup

For the object assets, we 3D printed all of them as shown in Figure 24. For (RO/MO-Sizes), we vary the scale by  $\pm 0.2$  times original object size. For RO/MO-Colors, we use two different printing filaments (red and blue). For the Light-Color variation, we use a single color-changing spotlight. The success condition of each of the tasks are defined as follows:

- `slide_block_to_target`: Push the colored block into the light yellow patch with the word ‘target’ written on it.
- `setup_chess`: Pick up the pawn piece and put it onto the blue marked chess spot.
- `insert_on_square_peg`: Pick up the colored square peg and insert it onto the right most pole.
- `scoop_with_spatula`: Push the spatula inwards to scoop up the cube, and then lift it up.

### C. Data collection

We gather data through demonstrations using an HTC Vive controller, a device capable of 6 degrees of freedom (DoF) tracking, ensuring precise positioning relative to a stationary base station. The positions captured are visualized in RViz as markers on the real-time RGB-D pointcloud data obtained from the Kinect camera sensor. Users determine desired positions to record as keypoints by referencing both the marker and the pointcloud. These specified positions are then realized through the employment of a motion planning algorithm. For this purpose, we employ the Franka ROS interface along with MoveIt, which inherently utilizes the RRT-Connect planning algorithm by default.

### D. Training and Evaluation details

The real robot’s training was run on 1 NVIDIA TITAN RTX GPU for 1 day. We monitor the keypoints predicted by the real-world model to verify the safety of the next action. The robot continues to execute predicted keypoints during evaluation unless manually halted by the human operator.

### E. Ablation study

To investigate the compound effects of multiple perturbations on model performance and their correlation with real-world scenarios, we conducted an ablation study using the task `slide_block_to_target`. We selected three perturbation combinations from real-world experiments and constructed three analogous real-world scenarios: a workbench, a dining table, and a study room table. Each scenario was subjected to the same perturbations derived from the benchmark’s combinations. We assessed PerAct, a model trained on these real-world experiments, across both sets of scenarios. Each scenario underwent 10 episodes across five trials. Our analysis revealed a strong correlation between two of the three scenarios, as detailed in the depicted in Table I.

```

env:
  task_name: "basketball_in_hoop"
  seed: 42
  scene:
    factors:
      - variation: object_color
        name: manip_obj_color
        enabled: True
        targets: [ball]
        seed: ${env.seed}
      - variation: object_color
        name: recv_obj_color
        enabled: True
        targets: [basket_ball_hoop_visual]
        seed: ${env.seed}
      - variation: object_texture
        name: manip_obj_tex
        enabled: True
        targets: [ball]
        mapping_mode: 2
        seed: ${env.seed}
      - variation: object_texture
        name: recv_obj_tex
        enabled: True
        targets: [basket_ball_hoop_visual]
        seed: ${env.seed}
      - variation: object_size
        name: manip_obj_size
        enabled: True
        targets: [ball]
        scale_range: [0.75, 1.25]
        seed: ${env.seed}
      - variation: object_size
        name: recv_obj_size
        enabled: True
        targets: [basket_ball_hoop_respondable]
        scale_range: [0.75, 1.15]
        seed: ${env.seed}
      - variation: light_color
        enabled: True
        targets: [DefaultLightA, DefaultLightB, DefaultLightD]
        color_range: [[0.0, 0.0, 0.0], [0.5, 0.5, 0.5]]
        seed: ${env.seed}
      - variation: table_texture
        enabled: True
        seed: ${env.seed}
      - variation: table_color
        enabled: True
        color_range: [[0.25, 0.25, 0.25], [1.0, 1.0, 1.0]]
        seed: ${env.seed}
      - variation: background_texture
        enabled: True
        seed: ${env.seed}
      - variation: distractor_object
        enabled: True
        targets: [spawn_boundary0]
        num_objects: 2
        seed: ${env.seed}
      - variation: distractor_object
        enabled: True
        targets: [spawn_boundary1]
        num_objects: 2
        seed: 43
      - variation: camera_pose
        enabled: True
        targets: [cam_front,
                  cam_over_shoulder_left,
                  cam_over_shoulder_right]
        euler_range: [[-0.05, -0.05, -0.05], [0.05, 0.05, 0.05]]
        position_range: [[-0.1, -0.1, -0.1], [0.1, 0.1, 0.1]]
        seed: ${env.seed}

```

```

      - variation: light_color
        enabled: True
        targets: [DefaultLightA, DefaultLightB, DefaultLightD]
        color_range: [[0.0, 0.0, 0.0], [0.5, 0.5, 0.5]]
        seed: ${env.seed}
      - variation: table_texture
        enabled: True
        seed: ${env.seed}
      - variation: table_color
        enabled: True
        color_range: [[0.25, 0.25, 0.25], [1.0, 1.0, 1.0]]
        seed: ${env.seed}
      - variation: background_texture
        enabled: True
        seed: ${env.seed}
      - variation: distractor_object
        enabled: True
        targets: [spawn_boundary0]
        num_objects: 2
        seed: ${env.seed}
      - variation: distractor_object
        enabled: True
        targets: [spawn_boundary1]
        num_objects: 2
        seed: 43
      - variation: camera_pose
        enabled: True
        targets: [cam_front,
                  cam_over_shoulder_left,
                  cam_over_shoulder_right]
        euler_range: [[-0.05, -0.05, -0.05], [0.05, 0.05, 0.05]]
        position_range: [[-0.1, -0.1, -0.1], [0.1, 0.1, 0.1]]
        seed: ${env.seed}

```

Fig. 2: Sample of a yaml configuration file for THE COLOSSEUM for one task. This configuration file controls the application of each perturbation\_factors for this task. One or more factors can be applied at the same time in one task instance, as compatible.

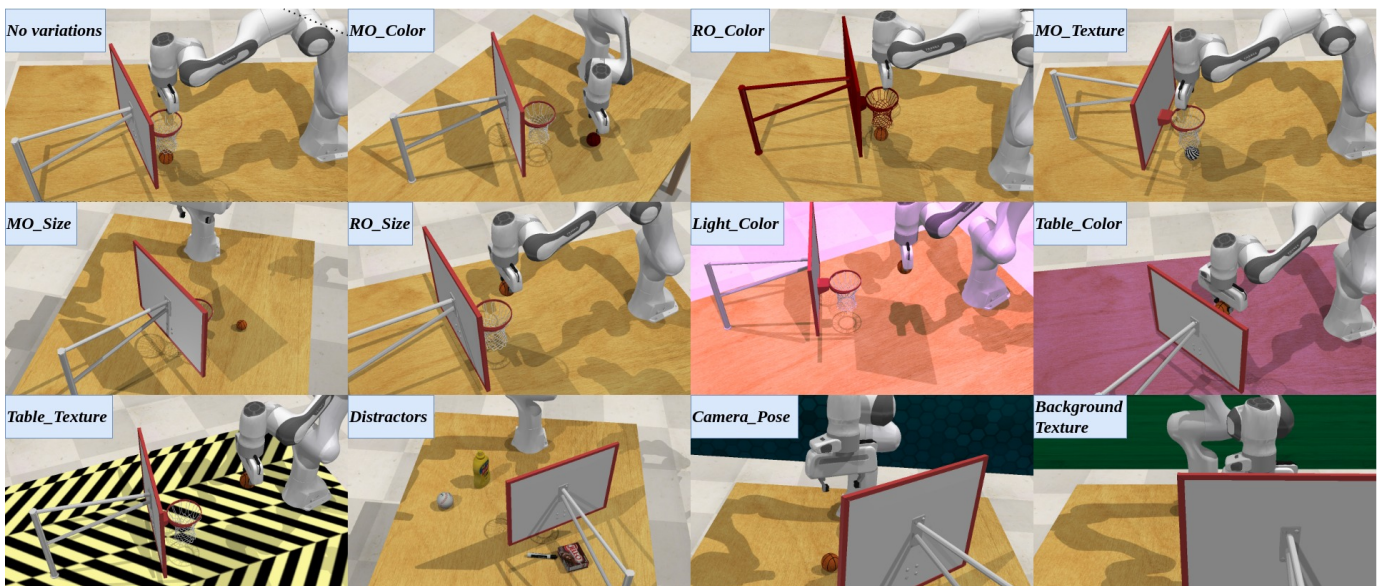

Fig. 3: Perturbations for the basketball\_in\_hoop task



TABLE I: Real-world ablation study

| Combination of perturbations                 | The Colosseum's perturbations | Realistic real-world scenarios | Correlation |
|----------------------------------------------|-------------------------------|--------------------------------|-------------|
| Distractors + MO_Size                        | [30,30,20,30,10]              | [10,0,10,10,30]                | 0.75        |
| Distractors+ Light_Color                     | [70,60,70,70,50], Cell 2      | [50,40,50,40,50]               | 0.01        |
| Light_Color+Table_Texture+Distractor+MO_Size | [30,40,40,40,30]              | [30,10,10,20,30]               | 0.83        |

| Variation<br>Task           | MO           | RO     | MO_Color | MO_Size      | MO_Texture | RO_Color | RO_Size      | RO_Texture | Object Mass |
|-----------------------------|--------------|--------|----------|--------------|------------|----------|--------------|------------|-------------|
|                             | -            | -      | discrete | continuous   | discrete   | discrete | continuous   | discrete   | continuous  |
| basketball_in_hoop          | ball         | hoop   | 20       | [0.75, 1.25] | 213        | 20       | [0.75, 1.15] | -          | -           |
| close_box                   | box          | -      | 20       | [0.75, 1.15] | -          | -        | -            | -          | -           |
| close_laptop_lid            | laptop       | -      | 20       | [0.75, 1.00] | -          | -        | -            | -          | -           |
| empty_dishwasher            | dishwasher   | plate  | 20       | [0.80, 1.00] | -          | 20       | [0.80, 1.00] | 213        | -           |
| get_ice_from_fridge         | cup          | fridge | 20       | [0.75, 1.25] | 213        | 20       | [0.75, 1.00] | -          | -           |
| hockey                      | stick        | ball   | 20       | [0.95, 1.05] | -          | 20       | [0.75, 1.25] | 213        | [0.1, 0.5]  |
| meat_on_grill               | meat         | grill  | 20       | [0.65, 1.15] | -          | 20       | -            | -          | -           |
| move_hanger                 | hanger       | pole   | 20       | -            | -          | 20       | -            | -          | -           |
| wipe_desk                   | sponge       | beans  | 20       | [0.75, 1.25] | 213        | 20       | -            | -          | [1.0, 5.0]  |
| open_drawer                 | drawer       | -      | 20       | [0.75, 1.00] | -          | -        | -            | -          | -           |
| slide_block_to_target       | block        | -      | 20       | -            | 213        | -        | -            | -          | [1.0, 15.0] |
| reach_and_drag              | stick        | block  | 20       | [0.80, 1.10] | 213        | 20       | [0.50, 1.00] | 213        | [0.5, 2.5]  |
| put_money_in_safe           | money        | safe   | 20       | [0.50, 1.00] | 213        | 20       | -            | 213        | -           |
| place_wine_at_rack_location | bottle       | shelve | 20       | [0.85, 1.15] | -          | 20       | [0.85, 1.15] | 213        | -           |
| insert_onto_square_peg      | peg          | spokes | 20       | [1.00, 1.50] | -          | 20       | [0.85, 1.15] | 213        | -           |
| stack_cups                  | cups         | -      | 20       | [0.75, 1.25] | 213        | -        | -            | -          | -           |
| turn_oven_on                | knobs        | -      | 20       | [0.50, 1.50] | -          | -        | -            | -          | -           |
| straighten_ropes            | ropes        | -      | 20       | -            | 213        | -        | -            | -          | -           |
| setup_chess                 | chess pieces | board  | 20       | [0.75, 1.25] | 213        | 20       | -            | -          | -           |
| scoop_with_spatula          | spatula      | block  | 20       | [0.75, 1.25] | 213        | 20       | [0.75, 1.50] | 213        | [1.0, 5.0]  |

TABLE II: Summary of tasks and their perturbation\_factors. The table specifies when a certain factor is applied to a certain task and its corresponding parameters.

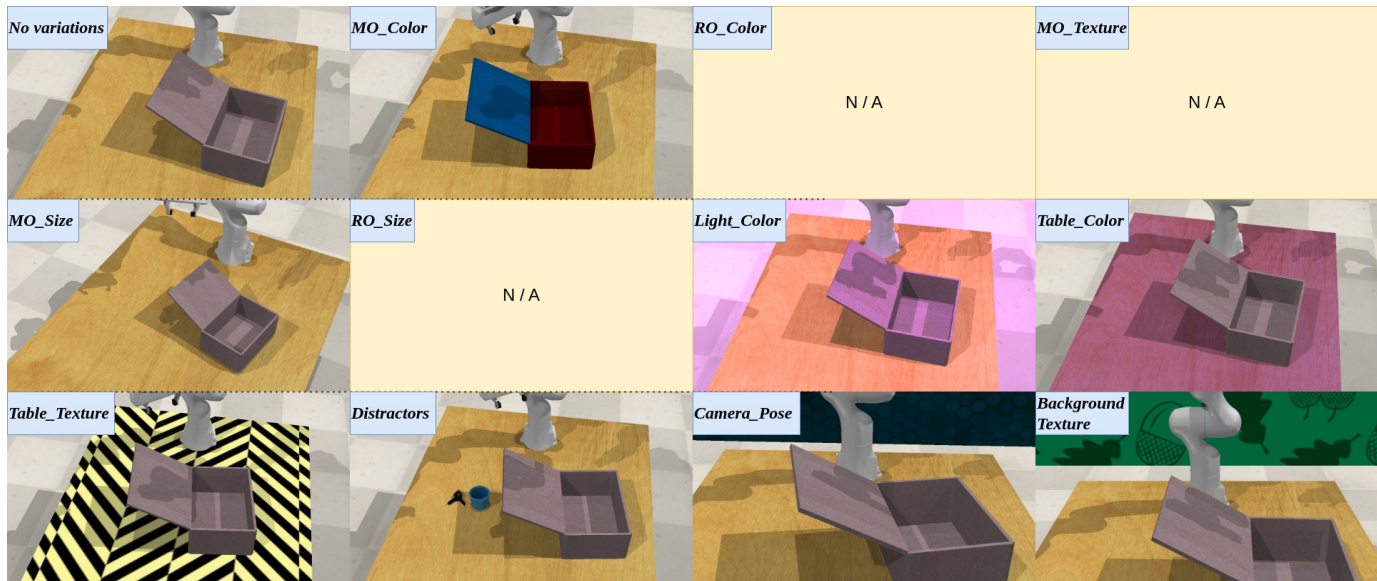

Fig. 4: Perturbations for the close\_box task

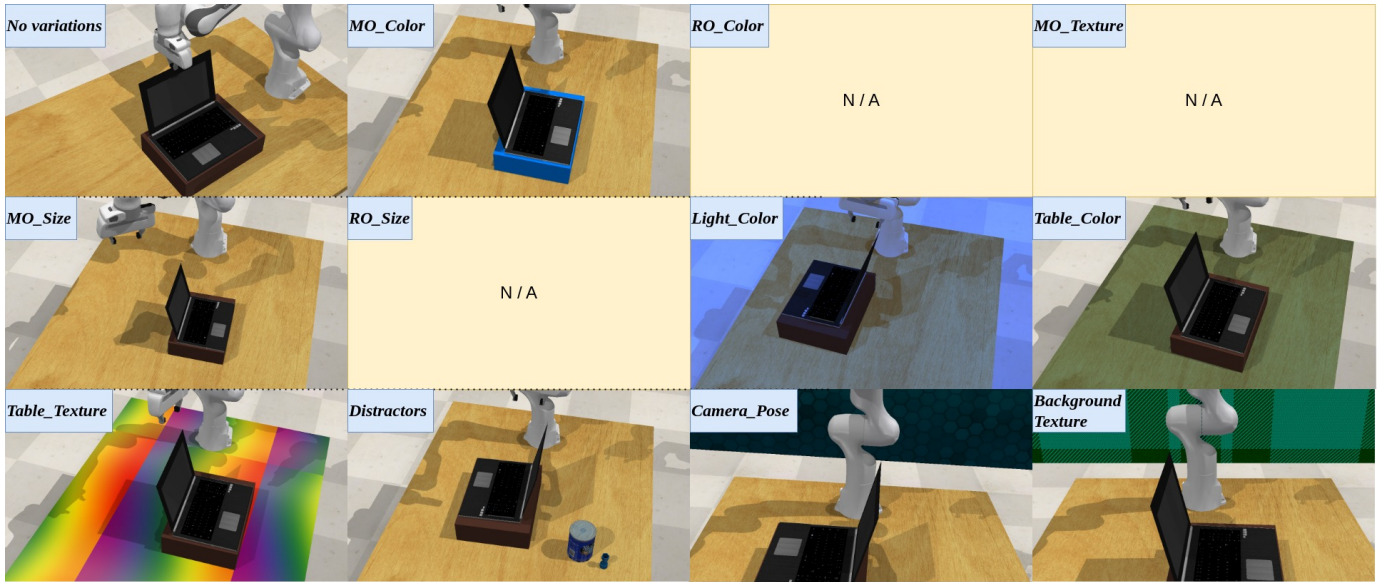

Fig. 5: Perturbations for the `close_laptop_lid` task

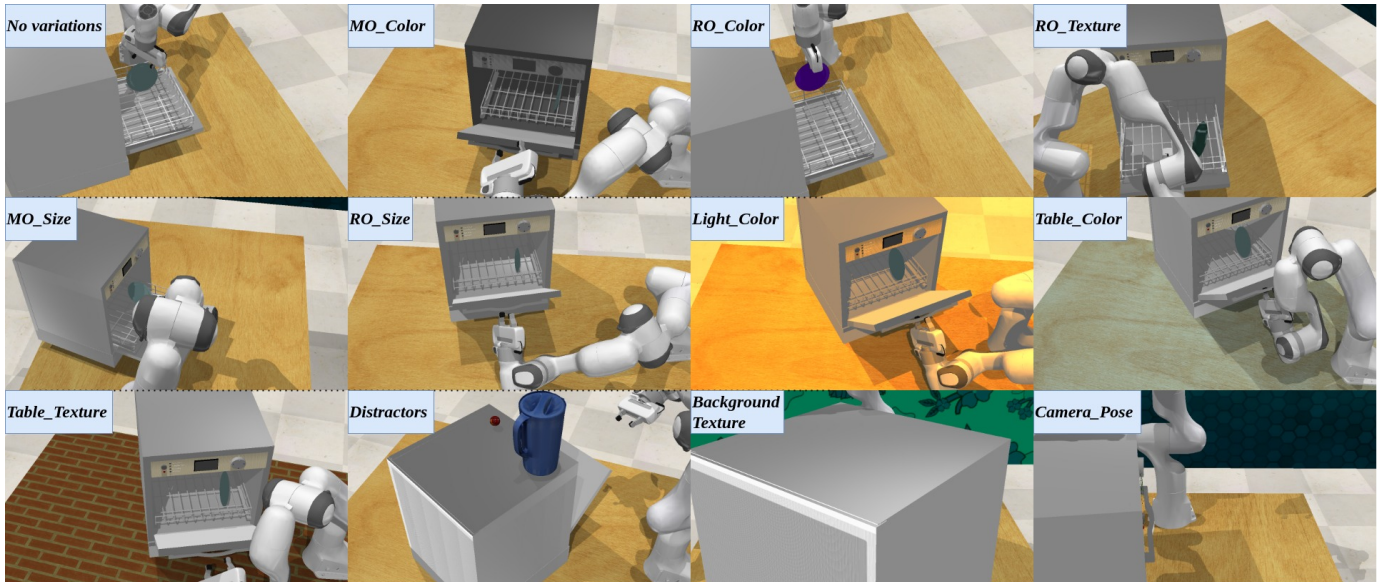

Fig. 6: Perturbations for the `empty_dishwasher` task



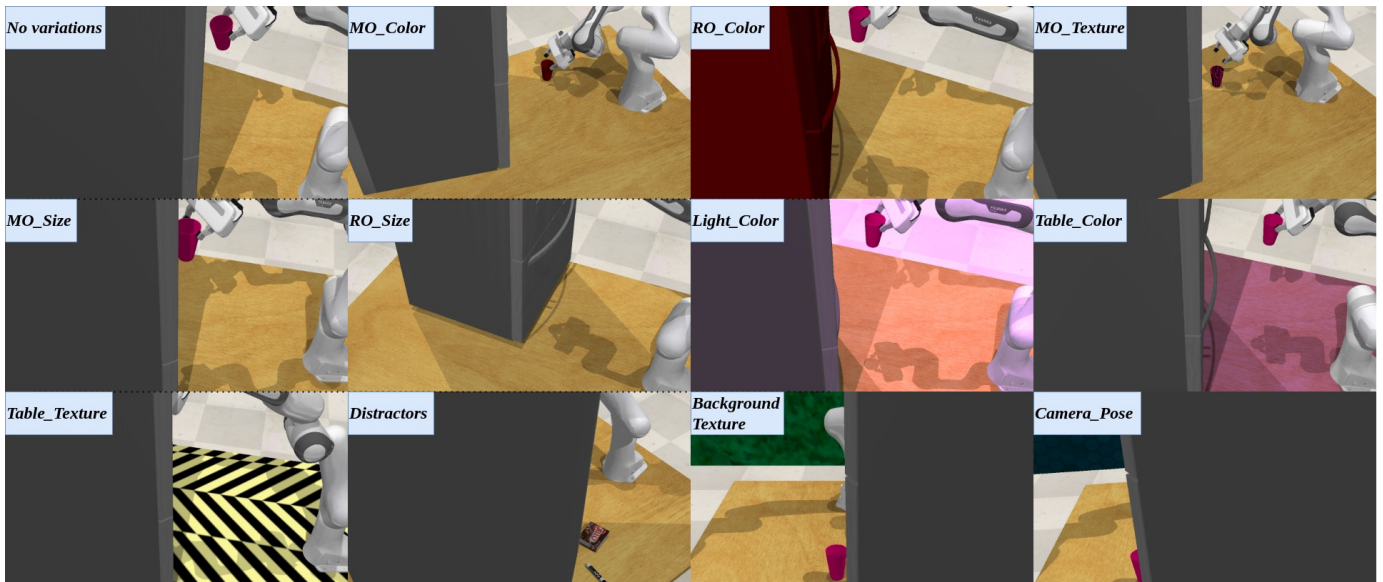

Fig. 7: Perturbations for the `get_ice_from_fridge` task

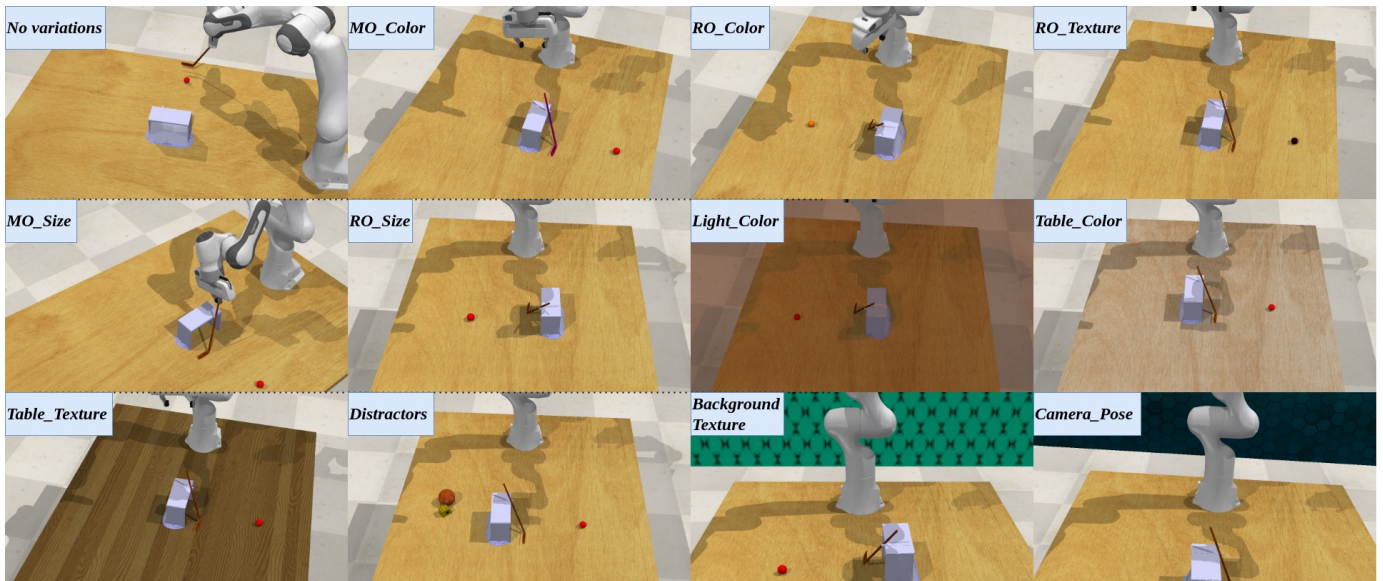

Fig. 8: Perturbations for the `hockey` task

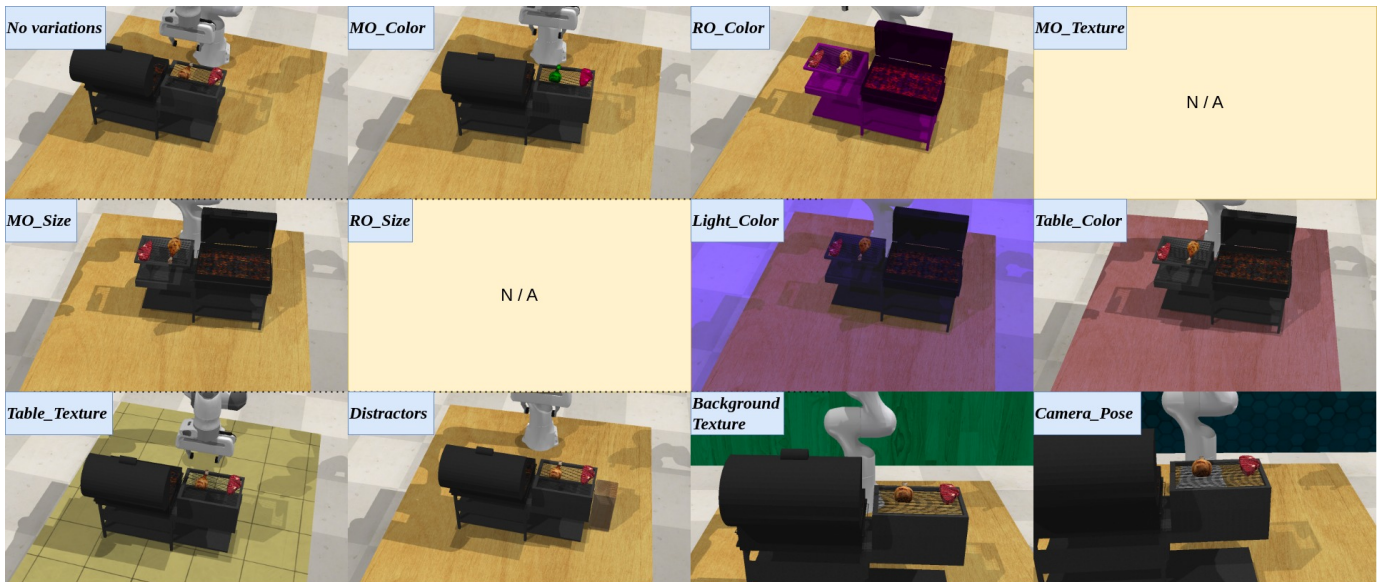

Fig. 9: Perturbations for the meat\_on\_grill task

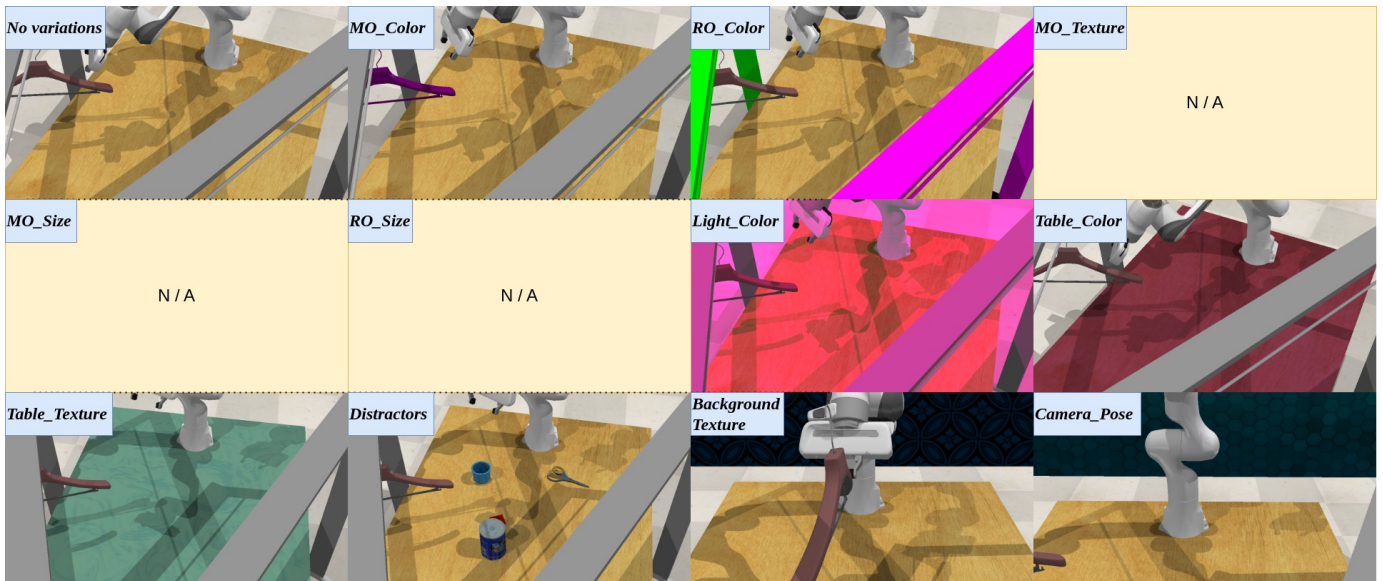

Fig. 10: Perturbations for the move\_hanger task



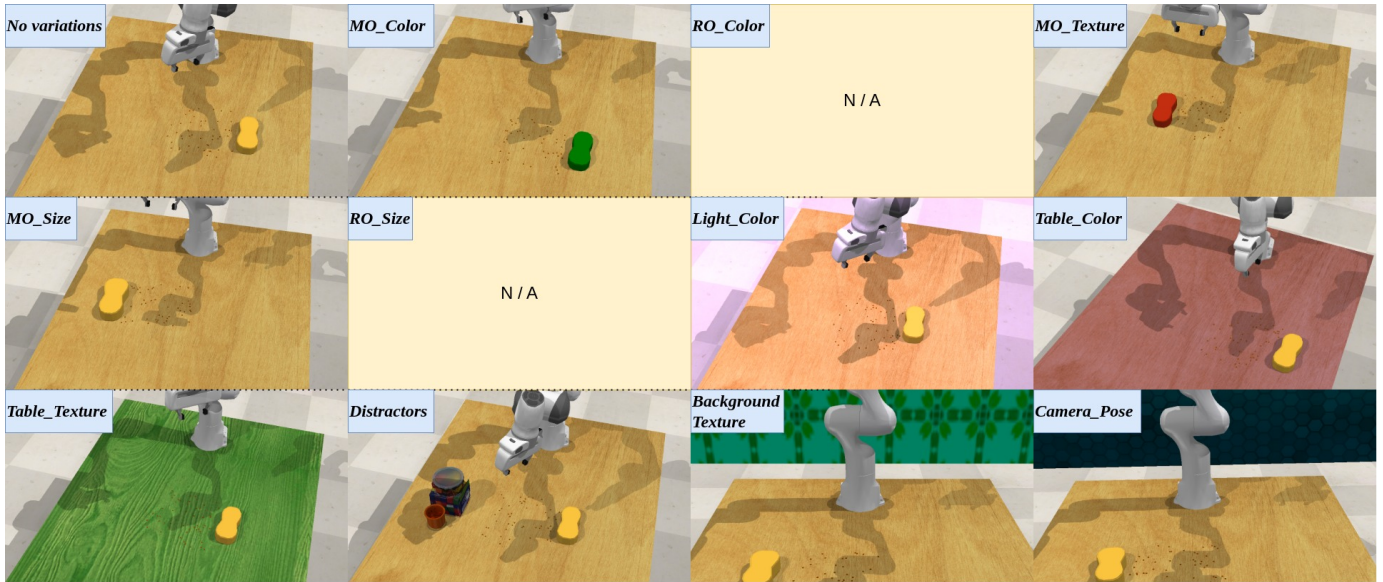

Fig. 11: Perturbations for the wipe\_desk task

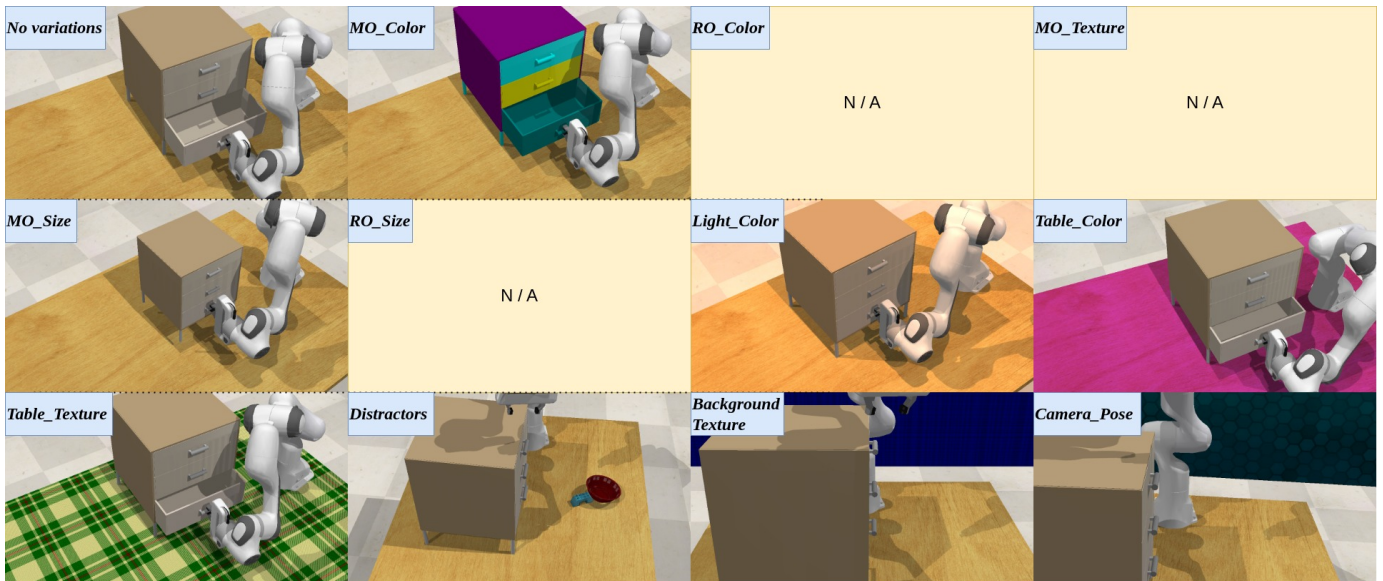

Fig. 12: Perturbations for the open\_drawer task

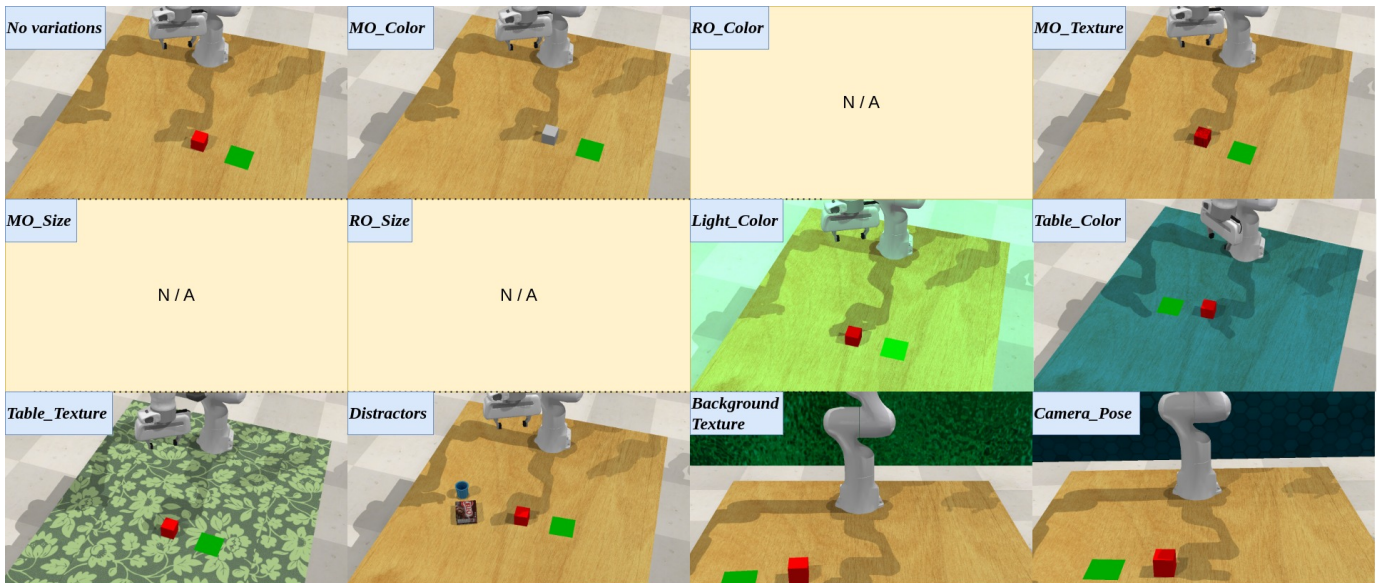

Fig. 13: Perturbations for the `slide_block_to_target` task

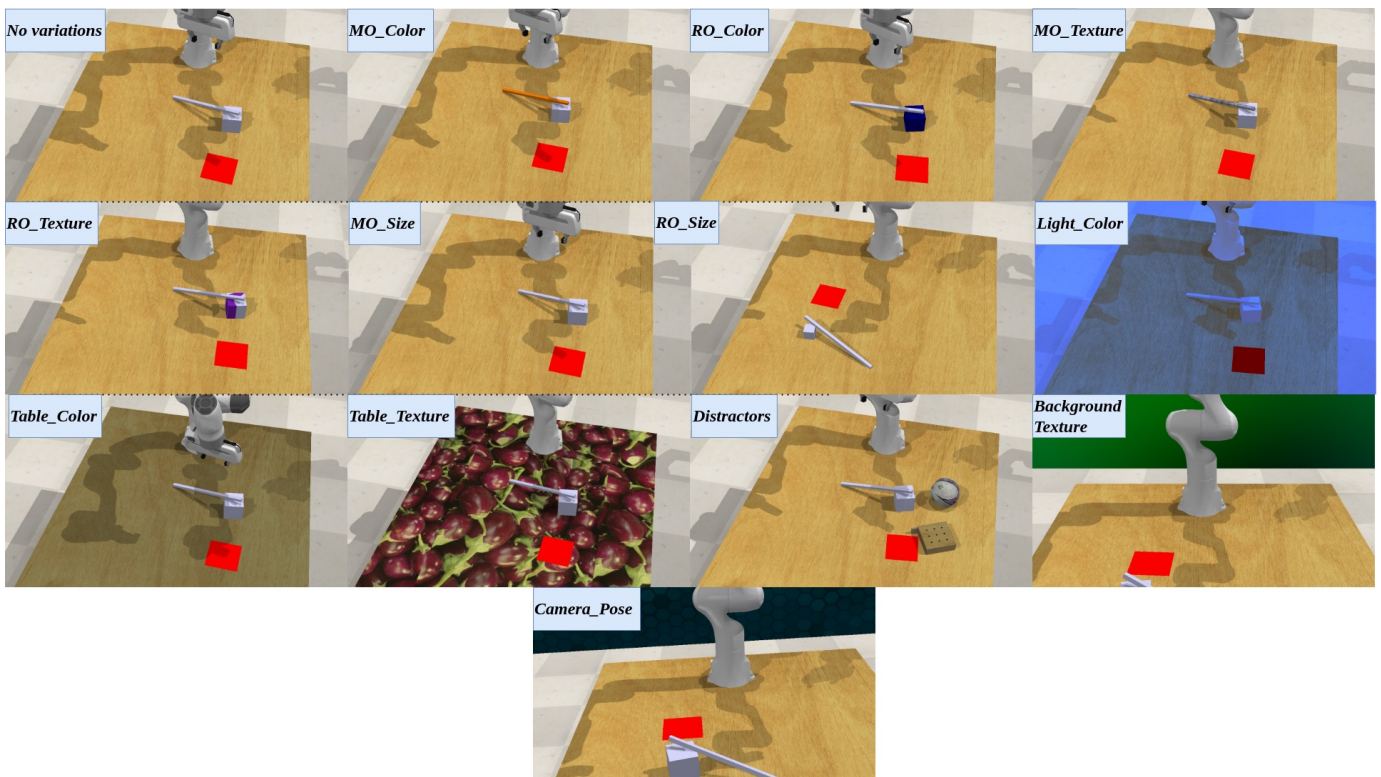

Fig. 14: Perturbations for the `reach_and_drag` task



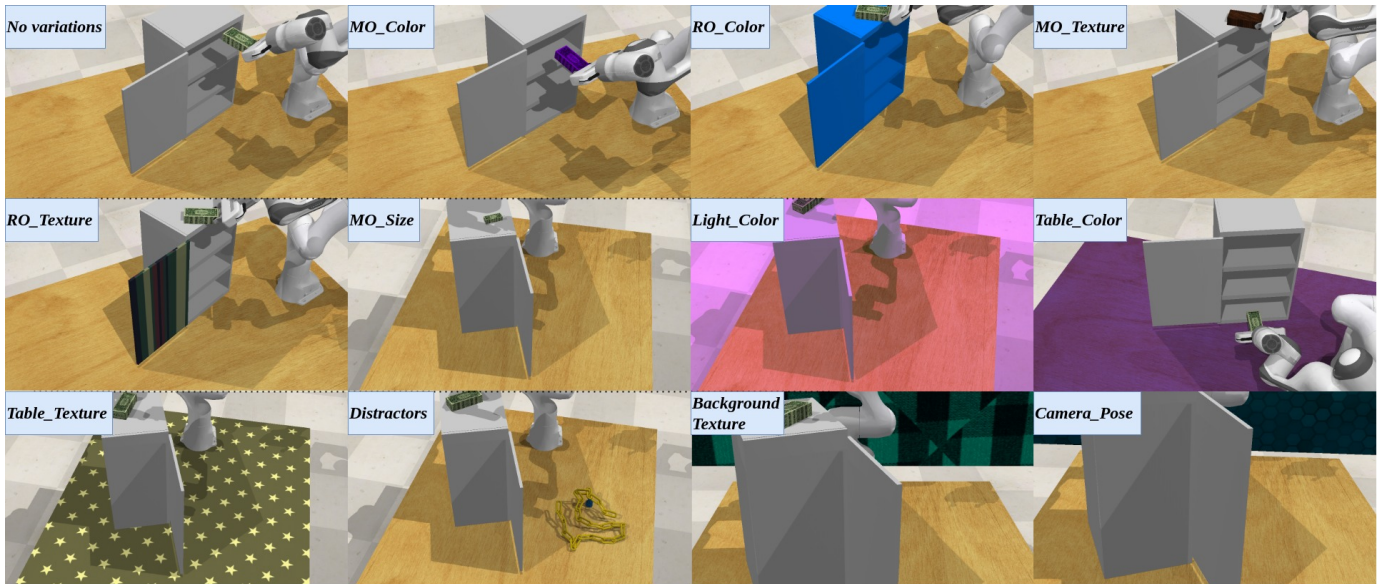

Fig. 15: Perturbations for the put\_money\_in\_safe task

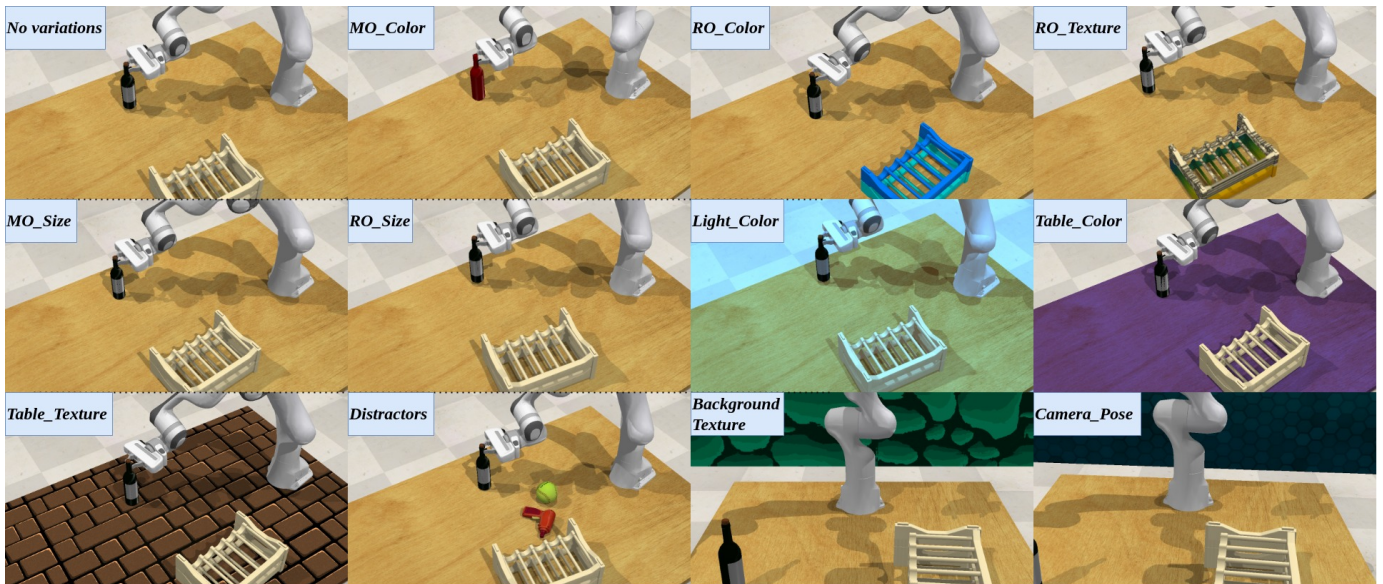

Fig. 16: Perturbations for the place\_wine\_at\_rack\_location task



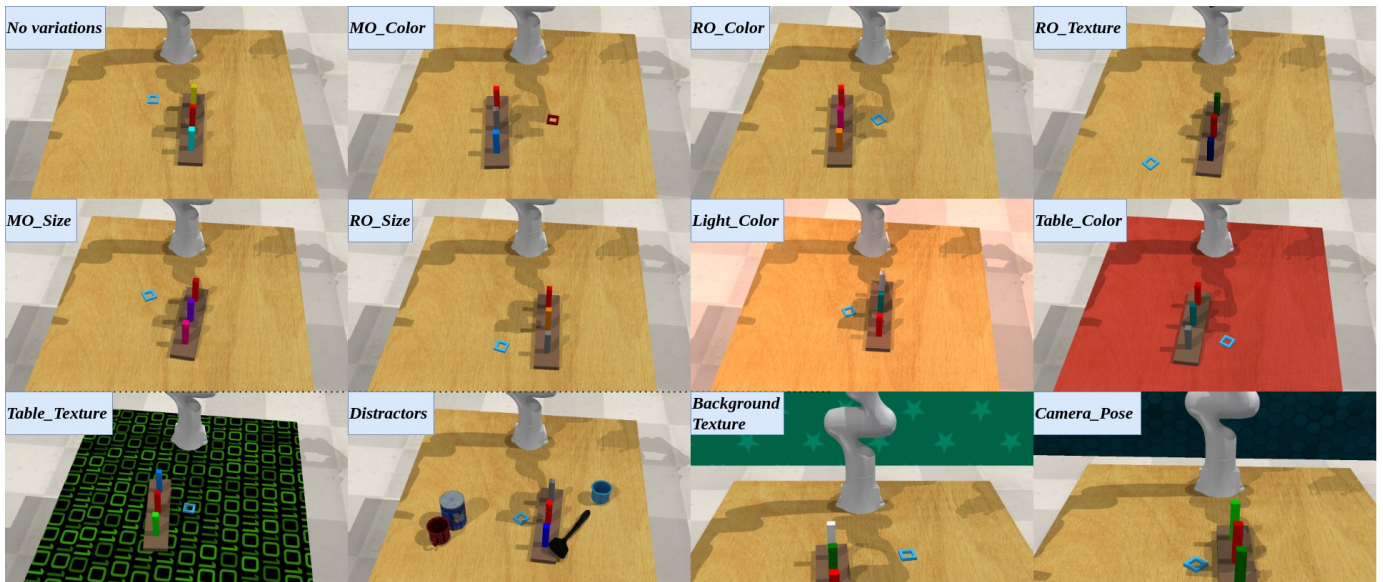

Fig. 17: Perturbations for the insert\_onto\_square\_peg\_location task

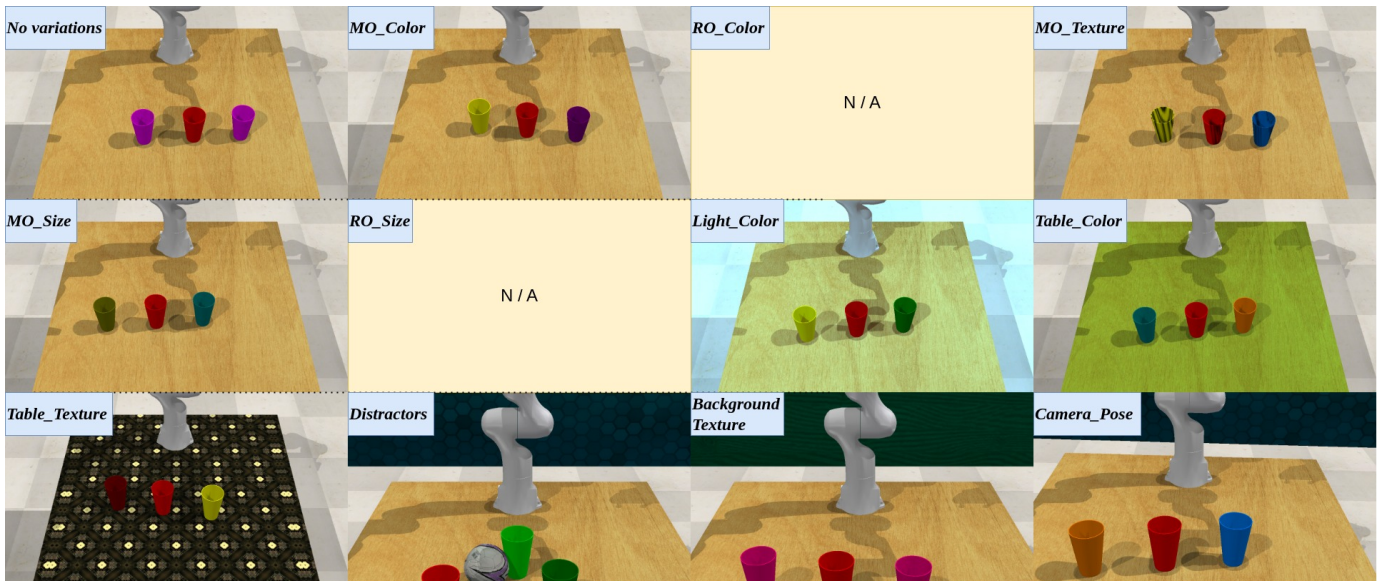

Fig. 18: Perturbations for the stack\_cups task



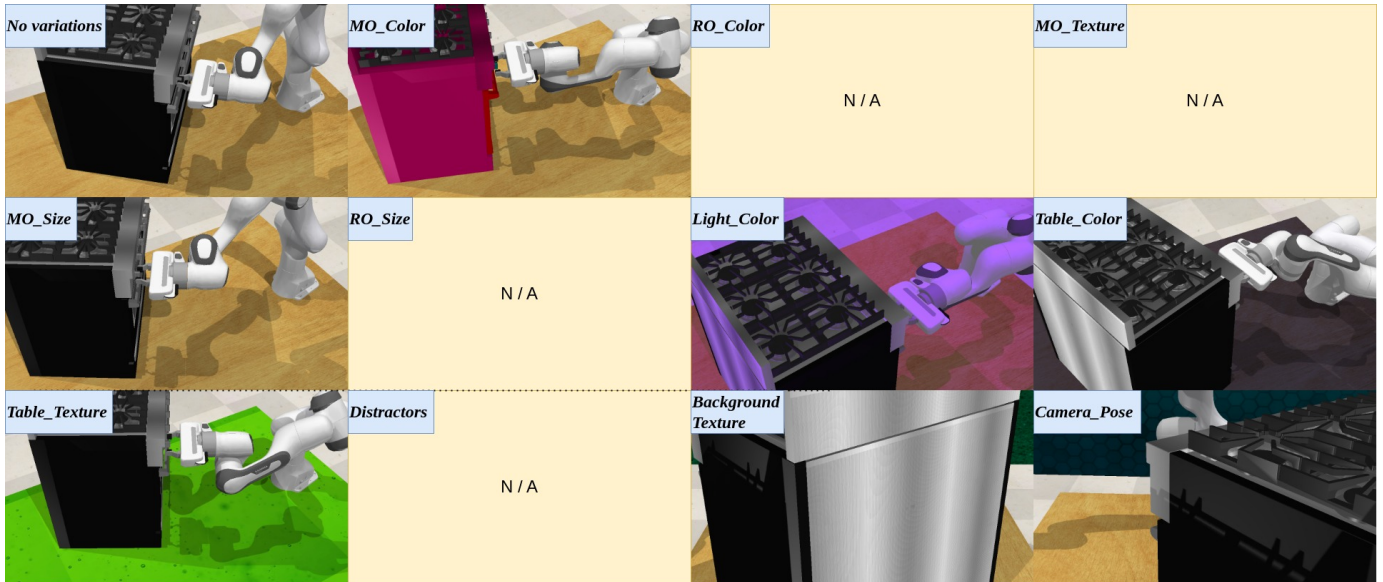

Fig. 19: Perturbations for the turn\_oven\_on task

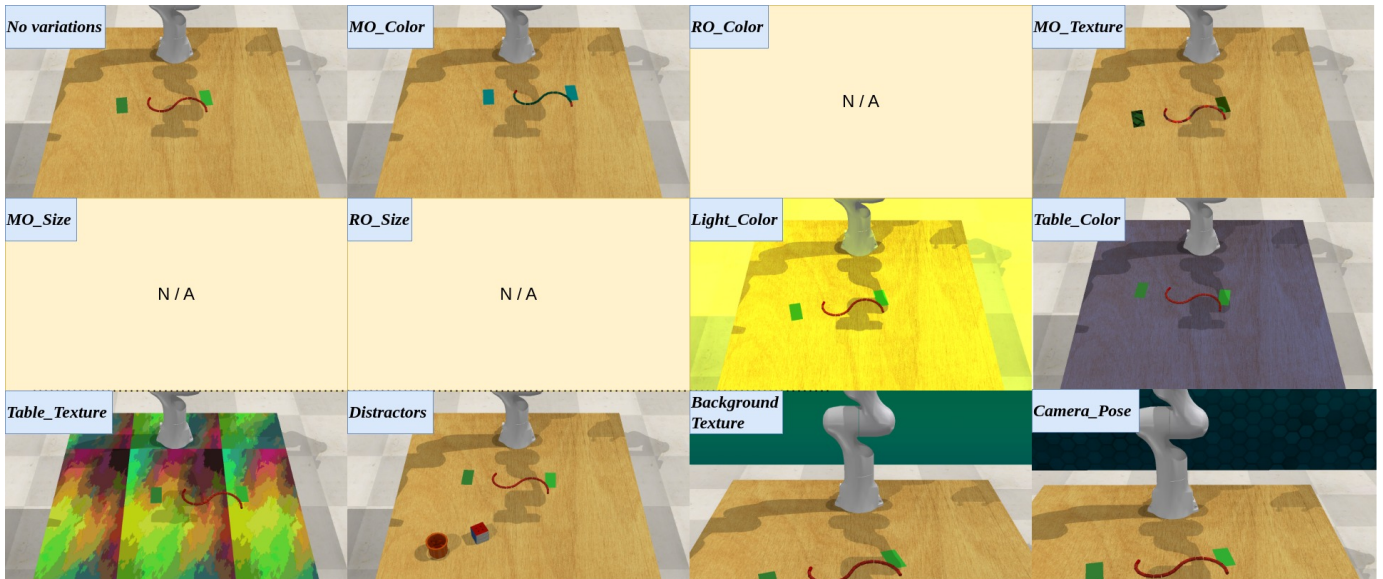

Fig. 20: Perturbations for the straighten\_rope task

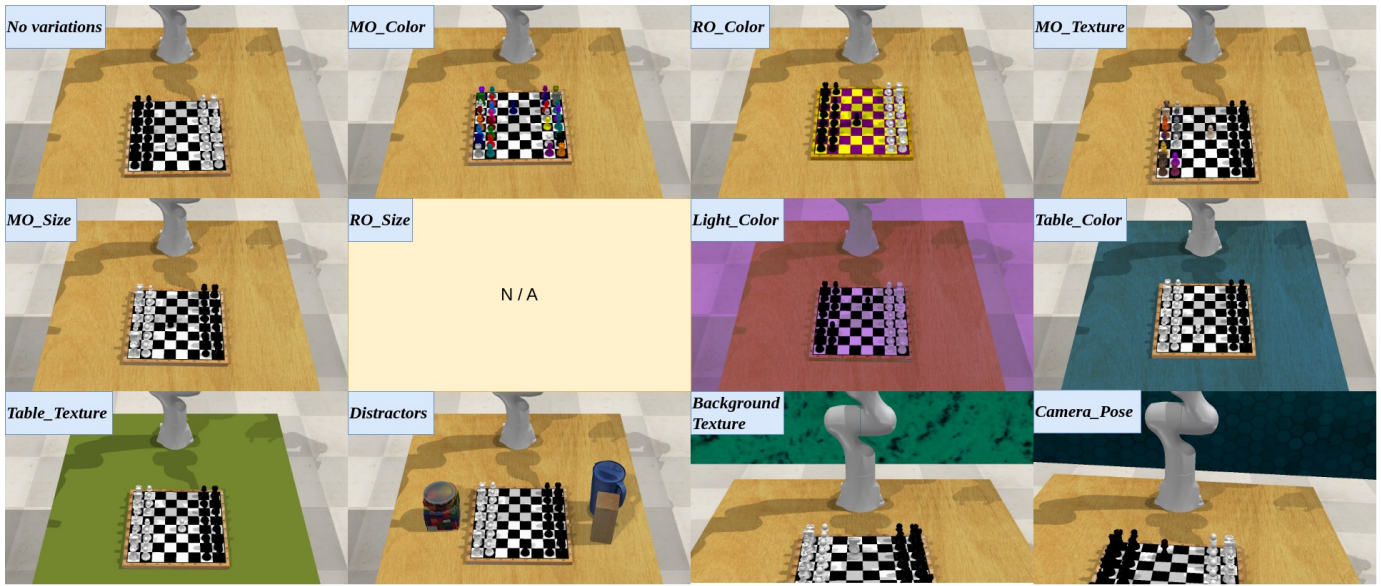

Fig. 21: Perturbations for the setup\_chess task

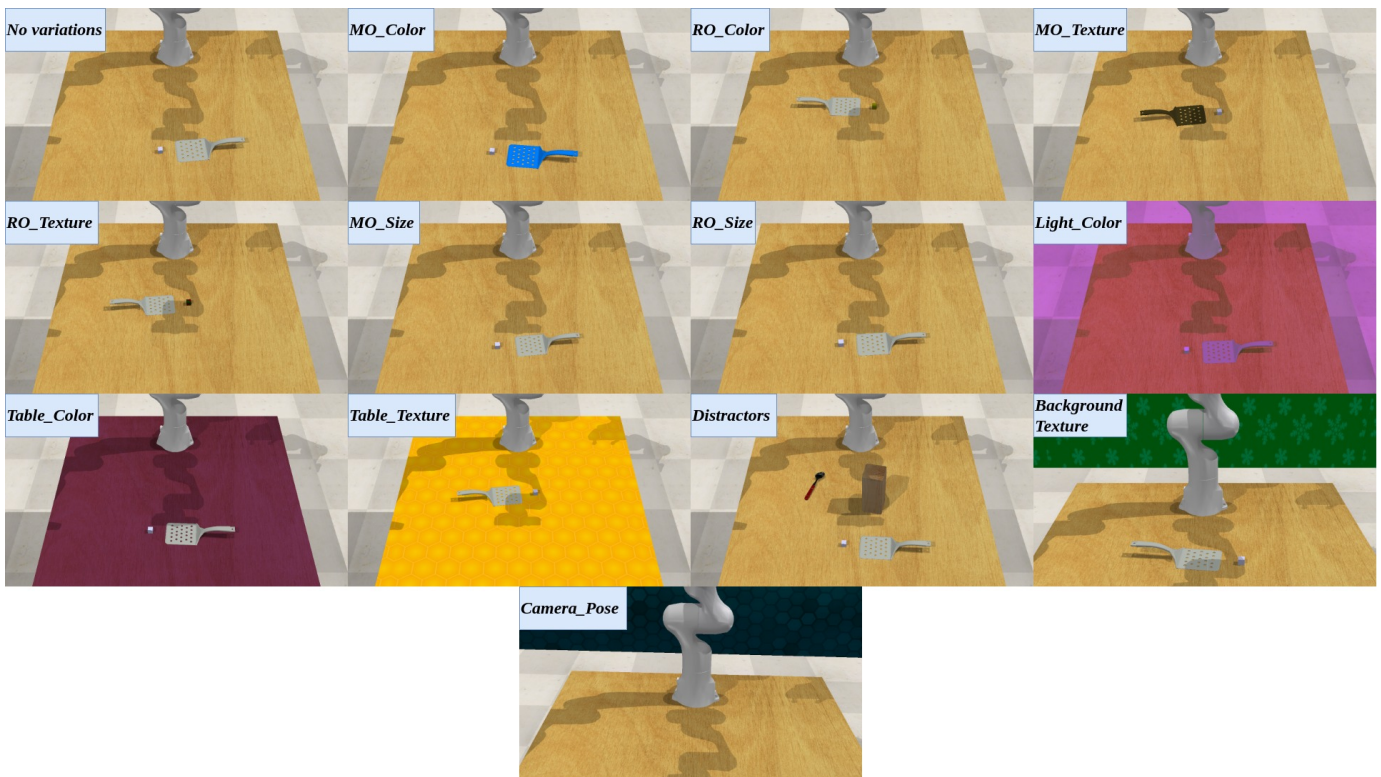

Fig. 22: Perturbations for the scoop\_with\_spatula task

| Task Name                   | No variations | All variations | MO_Color | RO_Color | MO_Texture | RO_Texture | MO_Size | RO_Size | Light-color | Table-Color | Table-texture | Distractor | Background-texture | RLBench variations | Camera pose | Object Friction | Object Mass |
|-----------------------------|---------------|----------------|----------|----------|------------|------------|---------|---------|-------------|-------------|---------------|------------|--------------------|--------------------|-------------|-----------------|-------------|
| basketball_in_hoop          | 100           | 0              | 100      | 72       | 100        | -          | 100     | 74      | 92          | 84          | 76            | 48         | 96                 | 100                | 96          | -               | -           |
| close_box                   | 65            | 0              | 28       | -        | -          | -          | 40      | -       | 50          | 15          | 28            | 30         | 50                 | 52                 | 64          | -               | -           |
| close_laptop_lid            | 96            | 80             | 80       | -        | -          | -          | 100     | -       | 92          | 88          | 80            | 88         | 100                | 100                | 96          | -               | -           |
| empty_dishwasher            | 0             | 0              | 0        | 0        | -          | 0          | 0       | 0       | 0           | 0           | 0             | 0          | 0                  | 4                  | 0           | -               | -           |
| get_ice_from_fridge         | 60            | 4              | 60       | 60       | 56         | -          | 60      | 68      | 60          | 76          | 40            | 72         | 76                 | 76                 | 84          | -               | -           |
| hockey                      | 0             | 0              | 0        | 0        | -          | 0          | 0       | 0       | 0           | 0           | 0             | 0          | 0                  | 0                  | 0           | 0               | 0           |
| meat_on_grill               | 92            | 44             | 64       | 72       | -          | -          | 92      | -       | 64          | 92          | 60            | 88         | 80                 | 92                 | 84          | -               | -           |
| move_hanger                 | 0             | 0              | 0        | 0        | -          | -          | -       | -       | 0           | 0           | 0             | 0          | 0                  | 0                  | 0           | -               | -           |
| wipe_desk                   | 0             | 0              | 0        | 0        | 0          | -          | 0       | -       | 0           | 0           | 0             | 0          | 0                  | 0                  | 0           | 0               | 0           |
| open_drawer                 | 28            | 0              | 0        | -        | -          | -          | 0       | -       | 16          | 80          | 32            | 28         | 8                  | 68                 | 76          | -               | -           |
| slide_block_to_target       | 24            | 0              | 4        | -        | 16         | -          | 68      | -       | 20          | 8           | 4             | 12         | 32                 | 32                 | 0           | -               | -           |
| reach_and_drag              | 36            | 0              | 20       | 12       | 4          | 8          | 40      | 8       | 12          | 12          | 8             | 0          | 20                 | 64                 | 20          | 12              | 24          |
| put_money_in_safe           | 32            | 0              | 32       | 16       | 44         | 28         | 20      | -       | 28          | 12          | 12            | 20         | 20                 | 44                 | 20          | -               | -           |
| place_wine_at_rack_location | 0             | 0              | 0        | 0        | -          | 0          | 8       | 12      | 8           | 0           | 4             | 0          | 4                  | 8                  | 8           | -               | -           |
| insert_onto_square_peg      | 4             | 0              | 0        | 4        | -          | 4          | 0       | 8       | 8           | 4           | 0             | 8          | 4                  | 28                 | 0           | -               | -           |
| stack_cups                  | 8             | 0              | 12       | -        | 0          | -          | 0       | -       | 0           | 16          | 0             | 0          | 4                  | 0                  | 8           | -               | -           |
| turn_oven_on                | 24            | 8              | 20       | -        | -          | -          | 40      | -       | 40          | 40          | 48            | 40         | 36                 | 32                 | 40          | -               | -           |
| straighten_ropes            | 0             | 0              | 0        | -        | 0          | -          | -       | -       | 0           | 0           | 0             | 0          | 0                  | 4                  | 14          | -               | -           |
| setup_chess                 | 44            | 8              | 28       | 76       | 44         | -          | 0       | -       | 56          | 64          | 64            | 48         | 68                 | 16                 | 60          | -               | -           |
| scoop_with_spatula          | 76            | 0              | 32       | 68       | 24         | 84         | 72      | 64      | 36          | 16          | 8             | 60         | 72                 | 68                 | 56          | 64              | 64          |

TABLE III: Results for PerAct for various perturbations

| Task Name                   | No variations | All variations | MO_Color | RO_Color | MO_Texture | RO_Texture | MO_Size | RO_Size | Light-color | Table-Color | Table-texture | Distractor | Background-texture | RLBench variations | Camera pose | Object Friction | Object Mass |
|-----------------------------|---------------|----------------|----------|----------|------------|------------|---------|---------|-------------|-------------|---------------|------------|--------------------|--------------------|-------------|-----------------|-------------|
| basketball_in_hoop          | 0             | 0              | 0        | 0        | 0          | -          | 0       | 0       | 0           | 0           | 0             | 0          | 0                  | 0                  | 0           | -               | -           |
| close_box                   | 32            | 0              | 0        | -        | -          | -          | 24      | -       | -           | 12          | 0             | 0          | 12                 | 24                 | 8           | -               | -           |
| close_laptop_lid            | 6             | 4              | 4        | -        | -          | -          | 4       | -       | 8           | 12          | 0             | 20         | 4                  | 4                  | 4           | -               | -           |
| empty_dishwasher            | 0             | 0              | 0        | 0        | -          | 0          | 0       | 0       | 0           | 0           | 0             | 0          | 0                  | 0                  | 0           | -               | -           |
| get_ice_from_fridge         | 0             | 0              | 0        | 0        | 0          | -          | 0       | 0       | 0           | 0           | 0             | 0          | 0                  | 0                  | 0           | -               | -           |
| hockey                      | 0             | 0              | 0        | 0        | -          | 0          | 0       | 0       | 0           | 0           | 0             | 0          | 0                  | 0                  | 0           | 0               | 0           |
| meat_on_grill               | 0             | 0              | 0        | 0        | -          | -          | 0       | -       | 0           | 0           | 0             | 0          | 0                  | 0                  | 0           | -               | -           |
| move_hanger                 | 4             | 0              | 0        | 0        | -          | -          | -       | -       | 0           | 0           | 0             | 0          | 0                  | 0                  | 0           | -               | -           |
| wipe_desk                   | 0             | 0              | 0        | 0        | 0          | -          | 0       | -       | 0           | 0           | 0             | 0          | 0                  | 0                  | 0           | 0               | 0           |
| open_drawer                 | 0             | 0              | 0        | -        | -          | -          | 0       | -       | 0           | 0           | 0             | 0          | 0                  | 0                  | 0           | -               | -           |
| slide_block_to_target       | 0             | 0              | 0        | -        | 0          | -          | 0       | -       | 0           | 0           | 0             | 0          | 0                  | 0                  | 0           | -               | -           |
| reach_and_drag              | 0             | 0              | 0        | 0        | 0          | 0          | 0       | 0       | 0           | 0           | 0             | 0          | 0                  | 0                  | 0           | 0               | 0           |
| put_money_in_safe           | 0             | 0              | 0        | 0        | 0          | 0          | 0       | -       | 0           | 0           | 0             | 0          | 0                  | 0                  | 0           | -               | -           |
| place_wine_at_rack_location | 0             | 0              | 0        | 0        | -          | 0          | 0       | 0       | 0           | 0           | 0             | 0          | 0                  | 0                  | 0           | -               | -           |
| insert_onto_square_peg      | 0             | 0              | 0        | 0        | -          | 0          | 0       | 0       | 0           | 0           | 0             | 0          | 0                  | 0                  | 0           | -               | -           |
| stack_cups                  | 0             | 0              | 0        | -        | 0          | -          | 0       | -       | 0           | 0           | 0             | 0          | 0                  | 0                  | 0           | -               | -           |
| turn_oven_on                | 12            | 8              | 4        | -        | -          | -          | 4       | -       | 12          | 4           | 4             | 12         | 8                  | 12                 | 4           | -               | -           |
| straighten_ropes            | 0             | 0              | 0        | -        | 0          | -          | -       | -       | 0           | 0           | 0             | 0          | 0                  | 0                  | 0           | -               | -           |
| setup_chess                 | 4             | 0              | 0        | 0        | 0          | -          | 0       | -       | 0           | 0           | 0             | 0          | 0                  | 0                  | 0           | -               | -           |
| scoop_with_spatula          | 0             | 0              | 0        | 0        | 0          | 0          | 0       | 0       | 0           | 0           | 0             | 0          | 0                  | 0                  | 0           | 0               | 0           |

TABLE IV: Results for R3M for various perturbations

| Task Name                   | No variations | All variations | MO_Color | RO_Color | MO_Texture | RO_Texture | MO_Size | RO_Size | Light-color | Table-Color | Table-texture | Distractor | Background-texture | RLBench variations | Camera pose | Object Friction | Object Mass |
|-----------------------------|---------------|----------------|----------|----------|------------|------------|---------|---------|-------------|-------------|---------------|------------|--------------------|--------------------|-------------|-----------------|-------------|
| basketball_in_hoop          | 4             | 0              | 4        | 0        | 4          | -          | 0       | 4       | 4           | 4           | 0             | 4          | 0                  | 0                  | 0           | -               | -           |
| close_box                   | 40            | 8              | 12       | -        | -          | -          | 60      | -       | 8           | 8           | 12            | 8          | 36                 | 24                 | 12          | -               | -           |
| close_laptop_lid            | 8             | 0              | 8        | -        | -          | -          | 0       | -       | 16          | 4           | 4             | 40         | 0                  | 4                  | 20          | -               | -           |
| empty_dishwasher            | 0             | 0              | 0        | 0        | -          | 0          | 0       | 0       | 0           | 0           | 0             | 0          | 0                  | 0                  | 0           | -               | -           |
| get_ice_from_fridge         | 0             | 0              | 0        | 0        | 0          | -          | 0       | 0       | 0           | 0           | 0             | 0          | 0                  | 0                  | 0           | -               | -           |
| hockey                      | 0             | 0              | 0        | 0        | -          | 0          | 0       | 0       | 0           | 0           | 0             | 0          | 0                  | 0                  | 0           | 0               | 0           |
| meat_on_grill               | 10            | 4              | 0        | 0        | -          | -          | 0       | -       | 0           | 0           | 0             | 12         | 0                  | 0                  | 4           | -               | -           |
| move_hanger                 | 0             | 0              | 0        | 0        | -          | -          | -       | -       | 0           | 0           | 0             | 0          | 0                  | 0                  | 0           | -               | -           |
| wipe_desk                   | 0             | 0              | 0        | 0        | 0          | -          | 0       | -       | 0           | 0           | 0             | 0          | 0                  | 0                  | 0           | 0               | 0           |
| open_drawer                 | 0             | 0              | 0        | -        | -          | -          | 0       | -       | 0           | 0           | 0             | 0          | 0                  | 0                  | 0           | -               | -           |
| slide_block_to_target       | 0             | 0              | 0        | -        | 0          | -          | 0       | -       | 0           | 0           | 0             | 0          | 0                  | 0                  | 0           | -               | -           |
| reach_and_drag              | 0             | 0              | 0        | 0        | 0          | 0          | 0       | 0       | 0           | 0           | 0             | 0          | 0                  | 0                  | 0           | 0               | 0           |
| put_money_in_safe           | 0             | 0              | 0        | 0        | 0          | 0          | 0       | -       | 0           | 0           | 0             | 0          | 0                  | 0                  | 0           | -               | -           |
| place_wine_at_rack_location | 0             | 0              | 0        | 0        | -          | 0          | 0       | 0       | 0           | 0           | 0             | 0          | 0                  | 0                  | 0           | -               | -           |
| insert_onto_square_peg      | 0             | 0              | 0        | 0        | -          | 0          | 0       | 0       | 0           | 0           | 0             | 0          | 0                  | 0                  | 0           | -               | -           |
| stack_cups                  | 0             | 0              | 0        | -        | 0          | -          | -       | -       | 0           | 0           | 0             | 0          | 0                  | 0                  | 0           | -               | -           |
| turn_oven_on                | 6             | 4              | 0        | -        | -          | -          | 20      | -       | 4           | 16          | 4             | 12         | 8                  | 12                 | 16          | -               | -           |
| straighten_ropes            | 0             | 0              | 0        | -        | 0          | -          | -       | -       | 0           | 0           | 0             | 0          | 0                  | 0                  | 0           | -               | -           |
| setup_chess                 | 0             | 0              | 0        | 0        | 0          | -          | 0       | -       | 0           | 0           | 0             | 0          | 0                  | 0                  | 0           | -               | -           |
| scoop_with_spatula          | 0             | 0              | 0        | 0        | 0          | 0          | 0       | 0       | 0           | 0           | 0             | 0          | 0                  | 0                  | 0           | 0               | 0           |

TABLE V: Results for MVP for various perturbations

| Task Name                   | No variations | All variations | MO_Color | RO_Color | MO_Texture | RO_Texture | MO_Size | RO_Size | Light-color | Table-Color | Table-texture | Distractor | Background-texture | RLBench variations | Camera pose | Object Friction | Object Mass |
|-----------------------------|---------------|----------------|----------|----------|------------|------------|---------|---------|-------------|-------------|---------------|------------|--------------------|--------------------|-------------|-----------------|-------------|
| basketball_in_hoop          | 84            | 4              | 92       | 4        | 68         | -          | 80      | 84      | 32          | 28          | 88            | 16         | 88                 | 100                | 68          | -               | -           |
| close_box                   | 80            | 36             | 8        | -        | -          | -          | 84      | -       | 96          | 56          | 80            | 80         | 84                 | 92                 | 68          | -               | -           |
| close_laptop_lid            | 52            | 24             | 80       | -        | -          | -          | 24      | -       | 36          | 48          | 64            | 20         | 68                 | 68                 | 56          | -               | -           |
| empty_dishwasher            | 0             | 4              | 0        | 0        | -          | 0          | 0       | 0       | 0           | 0           | 0             | 0          | 0                  | 0                  | 0           | -               | -           |
| get_ice_from_fridge         | 80            | 0              | 68       | 44       | 84         | -          | 56      | 88      | 72          | 60          | 68            | 40         | 84                 | 68                 | 80          | -               | -           |
| hockey                      | 4             | 0              | 0        | 0        | -          | 0          | 0       | 4       | 28          | 36          | 0             | 0          | 0                  | 0                  | 0           | 0               | 0           |
| meat_on_grill               | 12            | 40             | 16       | 56       | -          | -          | 8       | -       | 28          | 12          | 4             | 12         | 8                  | 76                 | 4           | -               | -           |
| move_hanger                 | 80            | 0              | 0        | 96       | -          | -          | -       | -       | 0           | 0           | 100           | 8          | 84                 | 84                 | 0           | -               | -           |
| wipe_desk                   | 0             | 0              | 0        | 0        | 0          | -          | 0       | -       | 0           | 0           | 0             | 0          | 0                  | 0                  | 0           | 0               | 0           |
| open_drawer                 | 64            | 0              | 0        | -        | -          | -          | 72      | -       | 68          | 64          | 68            | 52         | 52                 | 72                 | 72          | -               | -           |
| slide_block_to_target       | 0             | 0              | 0        | -        | 0          | -          | 0       | -       | 0           | 0           | 0             | 0          | 0                  | 72                 | 0           | -               | -           |
| reach_and_drag              | 84            | 0              | 24       | 52       | 88         | 88         | 92      | 0       | 72          | 52          | 88            | 4          | 88                 | 76                 | 80          | 88              | 88          |
| put_money_in_safe           | 44            | 0              | 68       | 0        | 44         | 28         | 52      | -       | 16          | 16          | 16            | 32         | 36                 | 60                 | 64          | -               | -           |
| place_wine_at_rack_location | 60            | 12             | 72       | 40       | -          | 72         | 36      | 64      | 88          | 88          | 88            | 60         | 32                 | 52                 | 56          | 72              | -           |
| insert_onto_square_peg      | 4             | 0              | 0        | 16       | -          | 12         | 24      | 4       | 8           | 16          | 20            | 4          | 4                  | 8                  | 8           | -               | -           |
| stack_cups                  | 0             | 0              | 12       | -        | 12         | -          | 0       | -       | 40          | 12          | 24            | 0          | 16                 | 24                 | 20          | -               | -           |
| turn_oven_on                | 88            | 8              | 40       | -        | -          | -          | 28      | -       | 52          | 36          | 80            | 72         | 92                 | 80                 | 80          | -               | -           |
| straighten_ropes            | 32            | 0              | 20       | -        | 48         | -          | -       | -       | 0           | 28          | 52            | 4          | 92                 | 40                 | 68          | -               | -           |
| setup_chess                 | 24            | 0              | 4        | -        | 24         | -          | 16      | -       | 0           | 4           | 8             | 0          | 4                  | 4                  | 20          | -               | -           |
| scoop_with_spatula          | 80            | 0              | 16       | 68       | 80         | 88         | 64      | 80      | 44          | 44          | 84            | 0          | 76                 | 88                 | 84          | 72              | 68          |

TABLE VI: Results for RVT for various perturbations



| Task Name                   | No variations | All variations | MO_Color | RO_Color | MO_Texture | RO_Texture | MO_Size | RO_Size | Light-color | Table-Color | Table-texture | Distractor | Background-texture | RLBench variations | Camera pose | Object Friction | Object Mass |
|-----------------------------|---------------|----------------|----------|----------|------------|------------|---------|---------|-------------|-------------|---------------|------------|--------------------|--------------------|-------------|-----------------|-------------|
| basketball_in_hoop          | 32            | 40             | 56       | 48       | 32         | -          | 60      | 52      | 40          | 40          | 60            | 61         | 44                 | 44                 | 56          | -               | -           |
| close_box                   | 0             | 0              | 0        | -        | -          | -          | 0       | -       | 0           | 0           | 0             | 0          | 0                  | 0                  | 0           | -               | -           |
| close_laptop_lid            | 0             | 0              | 0        | -        | -          | -          | 0       | -       | 0           | 0           | 0             | 0          | 0                  | 0                  | 0           | -               | -           |
| empty_dishwasher            | 0             | 0              | 0        | 0        | -          | 0          | 0       | 0       | 0           | 0           | 0             | 0          | 0                  | 0                  | 0           | -               | -           |
| get_ice_from_fridge         | 0             | 0              | 0        | 0        | 0          | -          | 0       | 0       | 0           | 0           | 0             | 0          | 0                  | 0                  | 0           | 0               | 0           |
| hockey                      | 0             | 0              | 0        | 0        | -          | 0          | 0       | 0       | 0           | 0           | 0             | 0          | 0                  | 0                  | 0           | 0               | 0           |
| meat_on_grill               | 0             | 0              | 0        | 0        | -          | -          | 0       | -       | 0           | 0           | 0             | 0          | 0                  | 0                  | 0           | -               | -           |
| move_hanger                 | 0             | 0              | 0        | 0        | -          | -          | -       | -       | 0           | 0           | 0             | 0          | 0                  | 0                  | 0           | -               | -           |
| wipe_desk                   | 0             | 0              | 0        | 0        | 0          | -          | 0       | -       | 0           | 0           | 0             | 0          | 0                  | 0                  | 0           | 0               | 0           |
| open_drawer                 | 0             | 0              | 0        | -        | -          | -          | 0       | -       | 0           | 0           | 0             | 0          | 0                  | 0                  | 0           | -               | -           |
| slide_block_to_target       | 76            | 80             | 72       | -        | 70         | -          | -       | -       | 60          | 64          | 84            | 76         | 88                 | 80                 | 68          | -               | -           |
| reach_and_drag              | 0             | 0              | 0        | 0        | 0          | 0          | 0       | 0       | 0           | 0           | 0             | 0          | 0                  | 0                  | 0           | 0               | 0           |
| put_money_in_safe           | 0             | 0              | 0        | 0        | 0          | 0          | 0       | -       | 0           | 0           | 0             | 0          | 0                  | 0                  | 0           | -               | -           |
| place_wine_at_rack_location | 0             | 0              | 0        | 0        | -          | 0          | 0       | 0       | 0           | 0           | 0             | 0          | 0                  | 0                  | 0           | -               | -           |
| insert_onto_square_peg      | 0             | 0              | 0        | 0        | -          | 0          | 0       | 0       | 0           | 0           | 0             | 0          | 0                  | 0                  | 0           | -               | -           |
| stack_cups                  | 0             | 0              | 0        | -        | 0          | -          | 0       | -       | 0           | 0           | 0             | 0          | 0                  | 0                  | 0           | -               | -           |
| turn_oven_on                | 0             | 0              | 0        | -        | -          | -          | 0       | -       | 0           | 0           | 0             | 0          | 0                  | 0                  | 0           | -               | -           |
| straighten_ropes            | 0             | 0              | 0        | -        | 0          | -          | -       | -       | 0           | 0           | 0             | 0          | 0                  | 0                  | 0           | -               | -           |
| setup_chess                 | 0             | 0              | 0        | -        | 0          | -          | 0       | -       | 0           | 0           | 0             | 0          | 0                  | 0                  | 0           | -               | -           |
| scoop_with_spatula          | 0             | 0              | 0        | 0        | 0          | 0          | 0       | 0       | 0           | 0           | 0             | 0          | 0                  | 0                  | 0           | 0               | 0           |

TABLE VII: Results for Voxposer for various perturbations

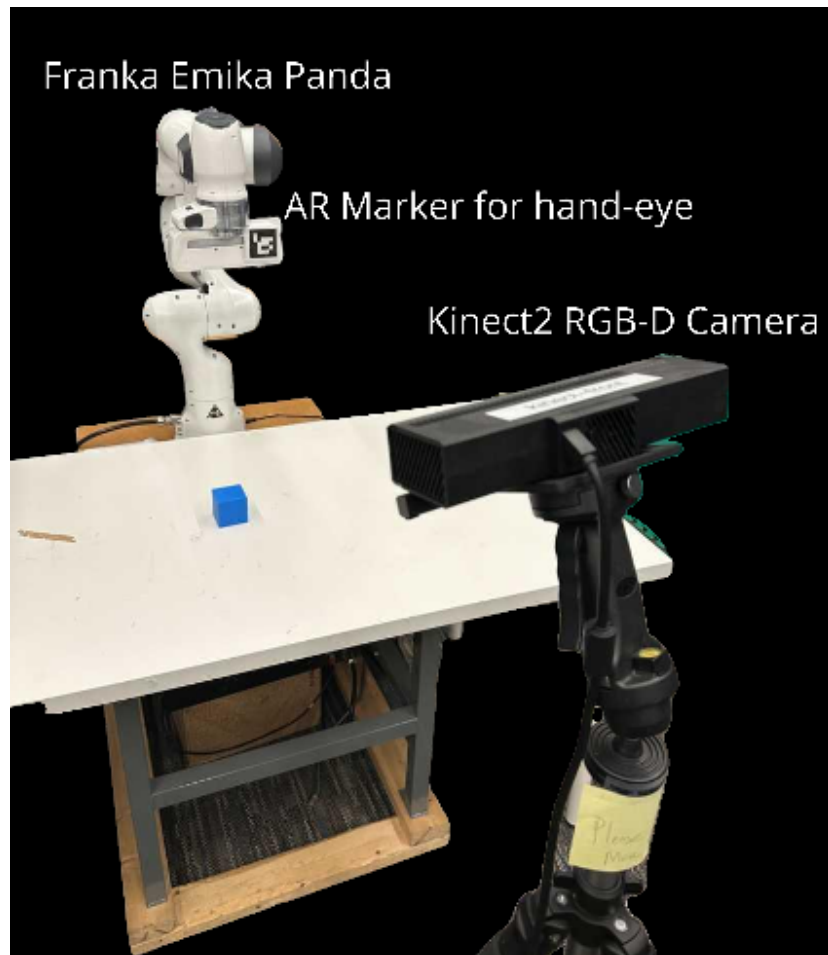

Fig. 23: Real-Robot Setup with Kinect-2 and Franka Panda.

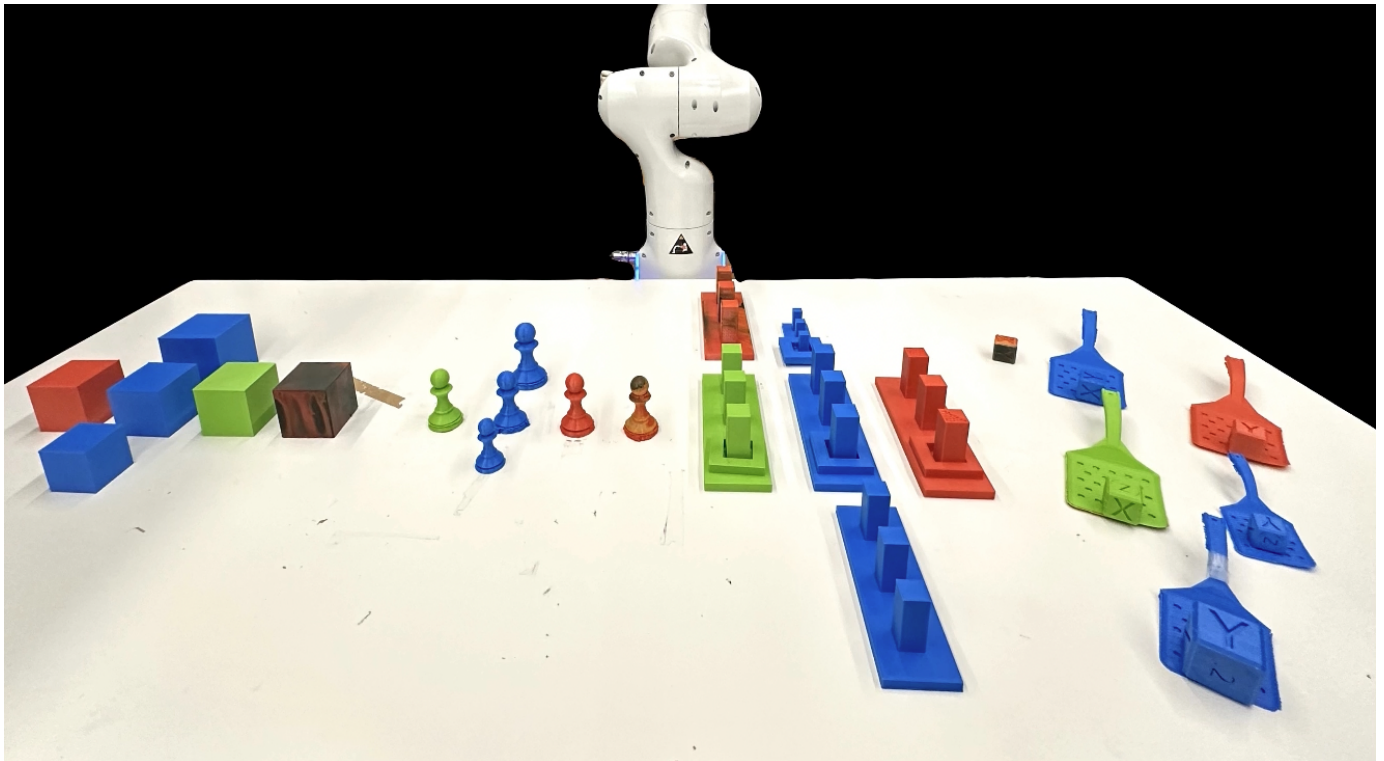

Fig. 24: 3D print-outs of all the assets for the real-world tasks.
